# Supplementary material
Source: publisher figshare collection journal article supplement (https://gsajournals.figshare.com/articles/dataset/_/8001722)
Supplement: Supplementary file 1 [file 2]

## Sheet: Sheet1
Table S3. Accession numbers for Zasp66 and Zasp67 orthologs. Related to Figure 2C.
Zasp66	Zasp67
ADF28789.1	AEA30987.1
ADH29882.1	ALC44229.1
ALC43451.1	CRL04620.1
BAH72766.1	EAT38166.1
CRK96112.1	EDX09910.1
CRK96113.1	EFN66961.1
CRK96116.1	EFN66962.1
EAT32701.1	EFN89208.1
EAT45621.1	EFN89209.1
EFN88596.1	EGI57946.1
EGI57956.1	EGI57947.1
ENN77349.1	ENN76235.1
ENN77350.1	ERL87065.1
ERL91503.1	ETN58254.1
ETN67313.1	EZA59115.1
EZA59107.1	EZA59116.1
KFB50720.1	EZA62377.1
KOC70755.1	KFB52605.1
KOX67895.1	KFB52606.1
KOX75243.1	KFB52607.1
KPI91369.1	KMQ96182.1
KPI97981.1	KMQ96183.1
KPI97983.1	KOC70725.1
KPJ11299.1	KOC70726.1
KYM79892.1	KOX77914.1
KYN05774.1	KOX77915.1
KYN20949.1	KPJ05368.1
KYN34199.1	KXJ72936.1
KYQ57599.1	KXJ74980.1
KZC05089.1	KYB24861.1
NP_001156347.1	KYB27689.1
NP_001163382.1	KYB27690.1
NP_001163386.1	KYB27691.1
NP_001166187.1	KYM78606.1
NP_001166188.1	KYN05783.1
NP_729396.2	KYN20941.1
NP_788481.1	KYN22244.1
OWR43964.1	KYN34206.1
OXU26006.1	KYN37517.1
PBC28615.1	KYQ57591.1
PNF41003.1	KZC08933.1
PSN42596.1	KZC14732.1
SPP77394.1	KZC14733.1
XP_001122389.1	NP_001261654.1
XP_001353107.3	NP_001261655.1
XP_001688838.1	NP_001287015.1
XP_001865101.1	NP_648358.2
XP_001956893.2	OAD60512.1
XP_001971624.2	OWR44180.1
XP_001996653.1	OWR44610.1
XP_002007386.2	OWR51337.1
XP_002027521.1	OXU18672.1
XP_002029757.1	PBC28590.1
XP_002046759.2	PCG78291.1
XP_002093425.2	PNF20650.1
XP_002425229.1	PNF20653.1
XP_003398527.1	PSN50751.1
XP_003492400.1	PZC72745.1
XP_003692820.1	XP_001353877.2
XP_004525242.1	XP_001843250.1
XP_004525243.1	XP_001956276.2
XP_004525247.1	XP_001972227.2
XP_004926432.1	XP_001983683.1
XP_004926433.1	XP_002007613.2
XP_004926434.1	XP_002027826.1
XP_006566121.1	XP_002029941.1
XP_006566122.1	XP_002047067.2
XP_006566123.1	XP_002067983.2
XP_006625021.1	XP_002094246.2
XP_006625023.1	XP_002425832.1
XP_006625024.1	XP_003436666.1
XP_006625025.1	XP_003436667.1
XP_006625026.1	XP_003436668.1
XP_008214547.1	XP_004530859.1
XP_008481050.1	XP_005180976.1
XP_008481058.1	XP_005180977.1
XP_008543886.1	XP_005180978.1
XP_011066670.1	XP_006622633.1
XP_011066671.1	XP_008558434.1
XP_011066672.1	XP_011066660.1
XP_011066673.1	XP_011144383.2
XP_011169546.1	XP_011144417.2
XP_011169548.1	XP_011164769.1
XP_011169550.1	XP_011169573.1
XP_011169551.1	XP_011169574.1
XP_011169554.1	XP_011183649.1
XP_011169556.1	XP_011183650.1
XP_011169557.1	XP_011183651.1
XP_011169559.1	XP_011183652.1
XP_011179624.1	XP_011183653.1
XP_011179625.1	XP_011183655.1
XP_011179626.1	XP_011210850.1
XP_011179627.1	XP_011300960.1
XP_011179628.1	XP_011503027.1
XP_011179632.1	XP_011548210.1
XP_011200140.1	XP_011548211.1
XP_011200141.1	XP_011548212.1
XP_011200142.1	XP_011548213.1
XP_011200143.1	XP_011553199.1
XP_011200144.1	XP_011553201.1
XP_011200145.1	XP_011562440.1
XP_011258318.1	XP_011634257.1
XP_011258319.1	XP_011690041.1
XP_011258322.1	XP_011690046.1
XP_011258323.1	XP_011690047.1
XP_011300377.1	XP_011872988.1
XP_011300378.1	XP_011872989.1
XP_011300379.1	XP_011872990.1
XP_011300382.1	XP_011872991.1
XP_011300383.1	XP_011872992.1
XP_011300385.1	XP_012056611.1
XP_011300386.1	XP_012149258.1
XP_011300387.1	XP_012149259.1
XP_011330697.1	XP_012159443.1
XP_011330698.1	XP_012159444.1
XP_011330699.1	XP_012159445.1
XP_011330700.1	XP_012159446.1
XP_011330701.1	XP_012159447.1
XP_011330703.1	XP_012216264.1
XP_011330706.1	XP_012216267.1
XP_011498672.1	XP_012267621.1
XP_011498673.1	XP_012267626.1
XP_011498674.1	XP_012347046.1
XP_011498675.1	XP_012531297.1
XP_011498676.1	XP_012531298.1
XP_011498677.1	XP_013117765.1
XP_011498678.1	XP_013117766.1
XP_011498680.1	XP_013138711.1
XP_011565231.1	XP_013178880.1
XP_011565247.1	XP_013178881.1
XP_011565254.1	XP_013178882.1
XP_011565261.1	XP_013178884.1
XP_011690065.1	XP_013178886.1
XP_011690066.1	XP_013187036.1
XP_011690067.1	XP_014090370.1
XP_011690068.1	XP_014224415.1
XP_011690069.1	XP_014359813.1
XP_011690071.1	XP_014477396.1
XP_011690072.1	XP_014479120.1
XP_011690076.1	XP_014615408.1
XP_011873007.1	XP_014615409.1
XP_011873008.1	XP_014765446.1
XP_011873009.1	XP_014765447.1
XP_011873010.1	XP_014765448.1
XP_011873011.1	XP_014765449.1
XP_011873013.1	XP_014765450.1
XP_012056614.1	XP_015013221.1
XP_012149399.1	XP_015013222.1
XP_012149400.1	XP_015013223.1
XP_012149405.1	XP_015017621.1
XP_012149406.1	XP_015017622.1
XP_012157113.1	XP_015017623.1
XP_012157114.1	XP_015017624.1
XP_012157115.1	XP_015017625.1
XP_012168253.1	XP_015017626.1
XP_012168254.1	XP_015017627.1
XP_012168255.1	XP_015017628.1
XP_012168257.1	XP_015017629.1
XP_012216070.1	XP_015031226.1
XP_012216072.1	XP_015031227.1
XP_012216073.1	XP_015031228.1
XP_012216074.1	XP_015031229.1
XP_012216076.1	XP_015031230.1
XP_012245463.1	XP_015031231.1
XP_012245464.1	XP_015031232.1
XP_012245465.1	XP_015031233.1
XP_012245466.1	XP_015033272.1
XP_012255315.1	XP_015033273.1
XP_012255401.1	XP_015033274.1
XP_012255486.1	XP_015043246.1
XP_012255570.1	XP_015043247.1
XP_012255656.1	XP_015043248.1
XP_012274901.1	XP_015043249.1
XP_012274902.1	XP_015043250.1
XP_012340644.1	XP_015043251.1
XP_012340645.1	XP_015050128.1
XP_012340646.1	XP_015050129.1
XP_012340647.1	XP_015050130.1
XP_012340649.1	XP_015121858.1
XP_012538868.1	XP_015121886.1
XP_012538869.1	XP_015178762.1
XP_012538870.1	XP_015183929.1
XP_012538871.1	XP_015370062.1
XP_012546057.1	XP_015437635.1
XP_012546058.1	XP_015591699.1
XP_012546059.1	XP_015591704.1
XP_013107555.1	XP_015591706.1
XP_013107556.1	XP_015835605.1
XP_013107557.1	XP_015835606.1
XP_013107562.1	XP_015835607.1
XP_013107563.1	XP_016031284.1
XP_013107567.1	XP_016031285.1
XP_013141383.1	XP_016031286.1
XP_013141384.1	XP_016031287.1
XP_013141386.1	XP_016031288.1
XP_013141387.1	XP_016769759.1
XP_013177989.1	XP_016837037.1
XP_013177990.1	XP_016914887.1
XP_013177991.1	XP_016914889.1
XP_013177992.1	XP_016914890.1
XP_013177993.1	XP_016916070.1
XP_013188409.1	XP_016934428.1
XP_013188418.1	XP_016934429.1
XP_013188434.1	XP_016934430.1
XP_013188442.1	XP_016934431.1
XP_014087212.1	XP_016966419.1
XP_014087214.1	XP_016966420.1
XP_014087216.1	XP_016966421.1
XP_014087218.1	XP_016966422.1
XP_014239053.1	XP_016966423.1
XP_014239054.1	XP_016977329.1
XP_014239055.1	XP_016977330.1
XP_014239056.1	XP_016977331.1
XP_014239057.1	XP_016977332.1
XP_014239059.1	XP_016977333.1
XP_014248906.1	XP_016977334.1
XP_014248908.1	XP_016977335.1
XP_014283125.1	XP_017015846.1
XP_014283135.1	XP_017015847.1
XP_014283149.1	XP_017015849.1
XP_014283156.1	XP_017028586.1
XP_014296664.1	XP_017028587.1
XP_014296665.1	XP_017040450.1
XP_014296666.1	XP_017040451.1
XP_014296667.1	XP_017040452.1
XP_014296668.1	XP_017040453.1
XP_014363652.1	XP_017080982.1
XP_014363653.1	XP_017080983.1
XP_014479949.1	XP_017080984.1
XP_014479950.1	XP_017080985.1
XP_014479951.1	XP_017091042.1
XP_014479953.1	XP_017091043.1
XP_014613699.1	XP_017091044.1
XP_014613700.1	XP_017133902.1
XP_014613701.1	XP_017136927.1
XP_014613702.1	XP_017136929.1
XP_014613703.1	XP_017136930.1
XP_014613704.1	XP_017136931.1
XP_014613705.1	XP_017460632.1
XP_014765008.1	XP_017484228.1
XP_014765009.1	XP_017784602.1
XP_014765013.1	XP_017784603.1
XP_014765017.1	XP_017784604.1
XP_014765019.1	XP_017784605.1
XP_015013386.1	XP_017784606.1
XP_015013387.1	XP_017789413.1
XP_015013390.1	XP_017842087.1
XP_015017456.1	XP_017842088.1
XP_015017458.1	XP_017842089.1
XP_015017461.1	XP_017842091.1
XP_015017463.1	XP_017861744.1
XP_015031161.1	XP_017861745.1
XP_015031162.1	XP_017861746.1
XP_015031165.1	XP_017861747.1
XP_015031166.1	XP_017861748.1
XP_015031167.1	XP_017861749.1
XP_015034519.1	XP_017875749.1
XP_015034521.1	XP_017956307.1
XP_015034522.1	XP_017956308.1
XP_015034525.1	XP_017956309.1
XP_015044154.1	XP_017956310.1
XP_015044157.1	XP_017956311.1
XP_015044161.1	XP_017956313.1
XP_015049524.1	XP_017956314.1
XP_015049525.1	XP_017956316.1
XP_015049527.1	XP_018054097.1
XP_015049528.1	XP_018054098.1
XP_015124202.1	XP_018054099.1
XP_015124203.1	XP_018054100.1
XP_015124204.1	XP_018300463.1
XP_015124206.1	XP_018330475.1
XP_015124207.1	XP_018330476.1
XP_015124208.1	XP_018349490.1
XP_015124209.1	XP_018349491.1
XP_015124211.1	XP_018349492.1
XP_015124212.1	XP_018349493.1
XP_015124214.1	XP_018349494.1
XP_015178835.1	XP_018360130.1
XP_015178836.1	XP_018361703.1
XP_015178837.1	XP_018392112.1
XP_015178838.1	XP_018793528.1
XP_015178839.1	XP_018793529.1
XP_015178840.1	XP_018793530.1
XP_015178842.1	XP_018793532.1
XP_015365293.1	XP_018793533.1
XP_015365294.1	XP_018793534.1
XP_015365295.1	XP_018793535.1
XP_015438562.1	XP_019527981.1
XP_015438563.1	XP_019527983.1
XP_015513064.1	XP_019527984.1
XP_015513072.1	XP_019527985.1
XP_015513079.1	XP_019527986.1
XP_015518924.1	XP_019527987.1
XP_015603927.1	XP_019556190.1
XP_015603929.1	XP_019556192.1
XP_015603930.1	XP_019556193.1
XP_015603931.1	XP_019556194.1
XP_015603932.1	XP_019556195.1
XP_015603934.1	XP_019556196.1
XP_015603935.1	XP_019556197.1
XP_016031036.1	XP_019556198.1
XP_016031038.1	XP_019556199.1
XP_016031048.1	XP_019761634.1
XP_016659252.1	XP_019761635.1
XP_016659253.1	XP_019847725.1
XP_016770036.1	XP_019847726.1
XP_016770037.1	XP_019847727.1
XP_016920554.1	XP_019847728.1
XP_016920560.1	XP_019847729.1
XP_016920561.1	XP_019871447.1
XP_016920562.1	XP_019871448.1
XP_016920563.1	XP_019885938.1
XP_016934265.1	XP_019888298.1
XP_016934267.1	XP_019891418.1
XP_016934271.1	XP_020278206.1
XP_016934272.1	XP_020711815.1
XP_016934275.1	XP_020720633.1
XP_016965876.1	XP_020723149.1
XP_016965877.1	XP_020723151.1
XP_016965880.1	XP_020816862.1
XP_016965881.1	XP_020816863.1
XP_016965882.1	XP_021197182.1
XP_016965884.1	XP_021197183.1
XP_016978865.1	XP_021197191.1
XP_016978867.1	XP_021204826.1
XP_016978869.1	XP_021204832.1
XP_016978870.1	XP_021204835.1
XP_016992487.1	XP_021204839.1
XP_016992488.1	XP_021204844.1
XP_016992490.1	XP_021713054.1
XP_016992491.1	XP_021713055.1
XP_016992492.1	XP_021713056.1
XP_016992494.1	XP_021713057.1
XP_016992497.1	XP_021713058.1
XP_017026389.1	XP_021713059.1
XP_017026390.1	XP_021713060.1
XP_017026392.1	XP_021917229.1
XP_017026393.1	XP_021917230.1
XP_017026397.1	XP_022114067.1
XP_017042602.1	XP_022114068.1
XP_017042603.1	XP_022119935.1
XP_017042604.1	XP_022176823.1
XP_017042605.1	XP_022194787.1
XP_017042608.1	XP_022213769.1
XP_017074106.1	XP_022213770.1
XP_017074108.1	XP_022213772.1
XP_017074111.1	XP_022213773.1
XP_017074112.1	XP_022832035.1
XP_017074113.1	XP_022832044.1
XP_017074115.1	XP_022832052.1
XP_017074117.1	XP_022832059.1
XP_017096058.1	XP_022832067.1
XP_017096059.1	XP_022909669.1
XP_017096061.1	XP_022913694.1
XP_017096062.1	XP_023013821.1
XP_017096065.1	XP_023013823.1
XP_017129442.1	XP_023013824.1
XP_017129445.1	XP_023013825.1
XP_017129446.1	XP_023027858.1
XP_017129447.1	XP_023033198.1
XP_017129448.1	XP_023033199.1
XP_017129449.1	XP_023033200.1
XP_017129451.1	XP_023169910.1
XP_017129454.1	XP_023169911.1
XP_017136621.1	XP_023169912.1
XP_017136622.1	XP_023245750.1
XP_017136623.1	XP_023291604.1
XP_017136624.1	XP_023291605.1
XP_017136627.1	XP_023291606.1
XP_017479231.1	XP_023309759.1
XP_017479232.1	XP_023309760.1
XP_017479233.1	XP_023720185.1
XP_017479237.1	XP_023720186.1
XP_017765400.1	XP_023720187.1
XP_017765401.1	XP_024222413.1
XP_017765402.1	XP_024869321.1
XP_017765403.1	XP_025157187.1
XP_017765405.1	XP_025157188.1
XP_017765406.1	XP_025268058.1
XP_017768013.1	XP_025408250.1
XP_017768014.1	XP_318394.5
XP_017790864.1
XP_017841837.1
XP_017841838.1
XP_017841839.1
XP_017841841.1
XP_017841845.1
XP_017841846.1
XP_017863907.1
XP_017863909.1
XP_017863910.1
XP_017882249.1
XP_017882251.1
XP_017955328.1
XP_017955330.1
XP_017955331.1
XP_017955334.1
XP_018052138.1
XP_018052139.1
XP_018052140.1
XP_018052141.1
XP_018052142.1
XP_018052144.1
XP_018300417.1
XP_018300418.1
XP_018300419.1
XP_018300420.1
XP_018300421.1
XP_018300423.1
XP_018332739.1
XP_018332740.1
XP_018332742.1
XP_018349563.1
XP_018349564.1
XP_018349565.1
XP_018349566.1
XP_018349567.1
XP_018349569.1
XP_018361637.1
XP_018361638.1
XP_018361639.1
XP_018361640.1
XP_018361642.1
XP_018361644.1
XP_018392102.1
XP_018392103.1
XP_018392104.1
XP_018392105.1
XP_018392106.1
XP_018392109.1
XP_018575614.1
XP_018575616.1
XP_018801607.1
XP_018801608.1
XP_018801609.1
XP_018801610.1
XP_018801611.1
XP_018801614.1
XP_018912983.1
XP_018912985.1
XP_019529034.1
XP_019529040.1
XP_019550901.1
XP_019550906.1
XP_019550907.1
XP_019550910.1
XP_019759600.1
XP_019759601.1
XP_019759602.1
XP_019759603.1
XP_019759604.1
XP_019871999.1
XP_019872000.1
XP_019872001.1
XP_019885969.1
XP_019885970.1
XP_019890185.1
XP_020278105.1
XP_020278106.1
XP_020278107.1
XP_020278108.1
XP_020278110.1
XP_020720820.1
XP_020816518.1
XP_020816519.1
XP_020816520.1
XP_020816521.1
XP_021201039.1
XP_021201040.1
XP_021201041.1
XP_021201043.1
XP_021201044.1
XP_021201045.1
XP_021201046.1
XP_021201047.1
XP_021203861.1
XP_021699214.1
XP_021699219.1
XP_021923030.1
XP_021923032.1
XP_021923033.1
XP_021923034.1
XP_021923035.1
XP_021923036.1
XP_022122676.1
XP_022122678.1
XP_022122679.1
XP_022122680.1
XP_022122681.1
XP_022181144.1
XP_022181145.1
XP_022181146.1
XP_022196183.1
XP_022205113.1
XP_022205114.1
XP_022205115.1
XP_022205116.1
XP_022205117.1
XP_022212728.1
XP_022212729.1
XP_022212731.1
XP_022212732.1
XP_022212736.1
XP_022212737.1
XP_022816726.1
XP_022816727.1
XP_022816728.1
XP_022816729.1
XP_022901895.1
XP_022901896.1
XP_022901898.1
XP_023025487.1
XP_023025494.1
XP_023025502.1
XP_023025509.1
XP_023025516.1
XP_023179380.1
XP_023179382.1
XP_023179384.1
XP_023179385.1
XP_023179388.1
XP_023298190.1
XP_023298191.1
XP_023298197.1
XP_023727083.1
XP_023727085.1
XP_023727086.1
XP_023727087.1
XP_023938522.1
XP_023951134.1
XP_023951142.1
XP_023951149.1
XP_023951156.1
XP_023951163.1
XP_023951171.1
XP_023951180.1
XP_023951189.1
XP_023951196.1
XP_024215587.1
XP_024880310.1
XP_024880311.1
XP_024880312.1
XP_024880313.1
XP_024880315.1
XP_025157732.1
XP_025157733.1
XP_025157734.1
XP_025157735.1
XP_025157737.1
XP_025208760.1
XP_025208761.1
XP_025268172.1
XP_025268173.1
XP_025268174.1
XP_025268178.1
XP_025417946.1
XP_025417948.1
XP_025602946.1
XP_025602947.1
XP_026293402.1
XP_967133.1
